# Supplementary material for: Comprehensive transcriptome analysis reveals genes in response to water deficit in the leaves of Saccharum narenga (Nees ex Steud.) hack
Source: PubMed Central journal article supplement (PMC6195978; doi:10.1186/s12870-018-1428-9), 2018-10-20

# Gene Ontology annotation of the assembled sugarcane genes

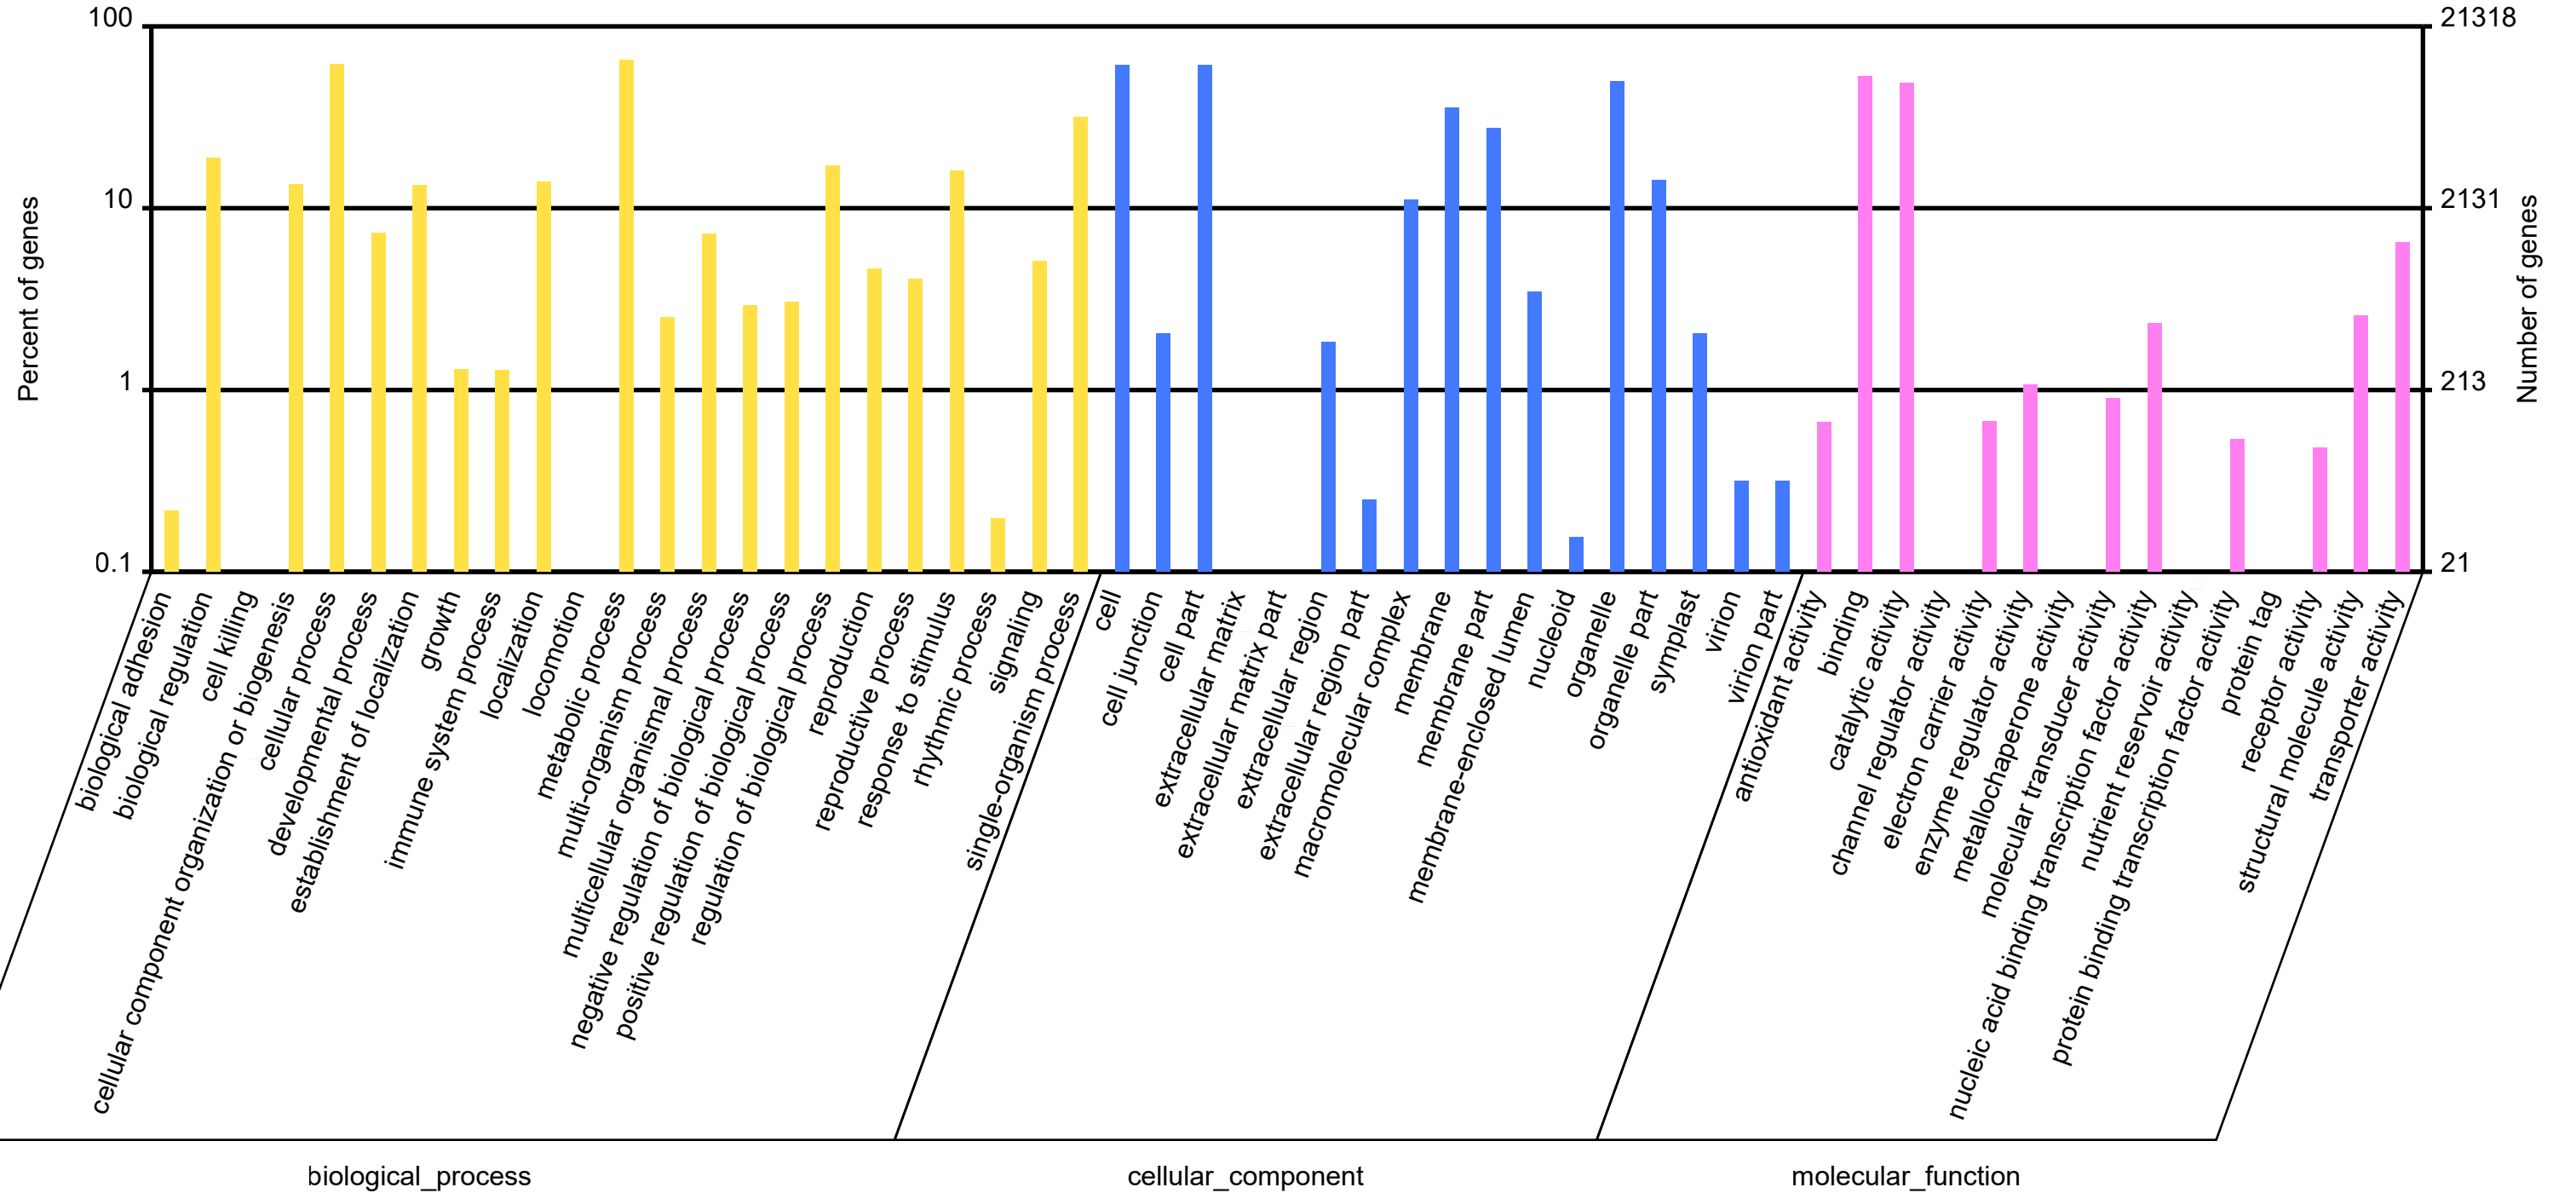

Supplement: 12870_2018_1428_MOESM1_ESM.pdf [file 12870_2018_1428_MOESM1_ESM.pdf]
